# Supplementary material for: Advancing Turbulence Essential Ocean Variable: A Reference Glider-Based Microstructure Dataset from the Western Mediterranean
Source: Copernicus journal article supplement (doi:10.5194/essd-2025-451), 2025-08-13
Supplement: Supplementary file 1 [file essd-2025-451-supplement.pdf]

# Advancing Turbulence Essential Ocean Variable: A Reference Glider-Based Microstructure Dataset from the Western

## 5 Mediterranean

Florian V. M. Kokoszka<sup>1</sup>, Mireno Borghini<sup>2</sup>, Katrin Schroeder<sup>3</sup>, Jacopo Chiggiato<sup>3</sup>, Joaquín Tintoré<sup>4</sup>, Nikolaos Zarokanellos<sup>4</sup>, Albert Miralles<sup>4</sup>, Patricia Rivera Rodríguez<sup>4</sup>, Manuel Rubio<sup>4</sup>, Miguel Charcos<sup>4</sup>, Benjamín Casas<sup>4</sup>, and Anneke ten Doeschate<sup>5</sup>

10 <sup>1</sup>Institute of Marine Science (ISMAR), Department of Earth System Sciences and Technologies for the Environment, National Research Council (CNR), Naples, Italy

<sup>2</sup>Institute of Marine Science (ISMAR), Department of Earth System Sciences and Technologies for the Environment, National Research Council (CNR), Lerici, Italy

<sup>3</sup>Institute of Marine Science (ISMAR), Department of Earth System Sciences and Technologies for the Environment, National Research Council (CNR), Venezia, Italy

15 <sup>4</sup>SOCIB, Balearic Islands Coastal Observing and Forecasting System, Palma, Spain

<sup>5</sup>Rockland Scientific, Victoria, B.C., Canada

*Correspondence to:* Florian V. M. Kokoszka (florianvolmermartin.kokoszka@cnr.it)

## 20 Supplementary

### Supplementary Figure 1:

Glider Flight Model (GFM) computed following the algorithm of Merckelbach et al. (2019) for each year of the SMART glider missions. Calculations are based on L0 core variables provided by SOCIB. The top panel shows the estimated incident velocity over the full mission period. The middle panel  
25 presents a zoomed-in view of incident velocity during an arbitrary segment. The bottom panel displays the corresponding angle of attack (in degrees) for the same period.

2024

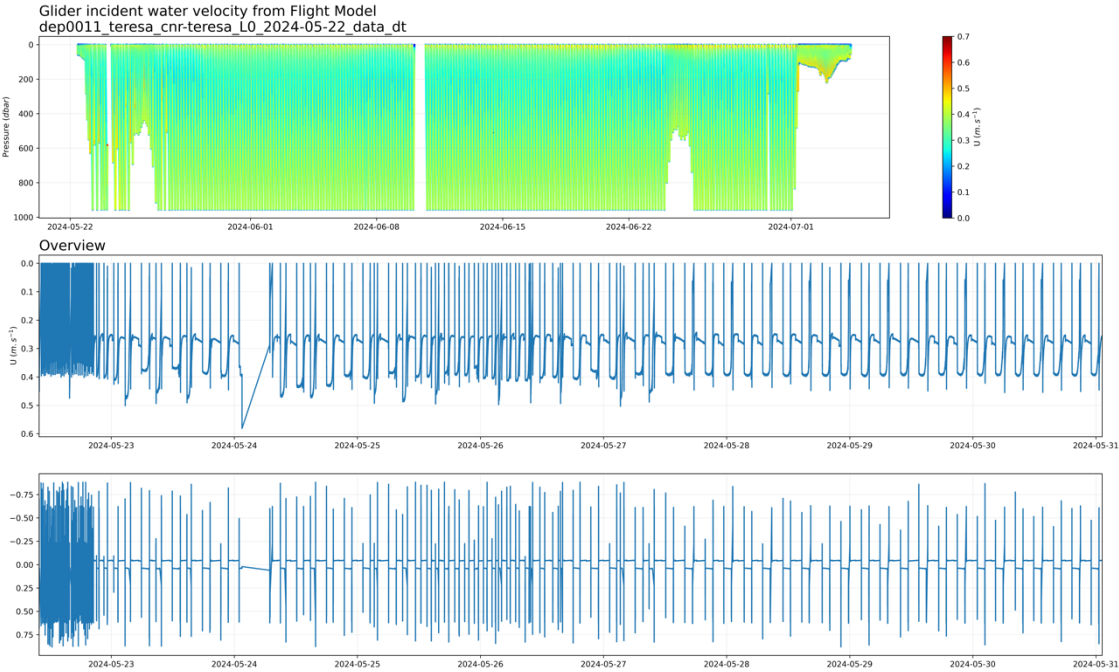

35

2023

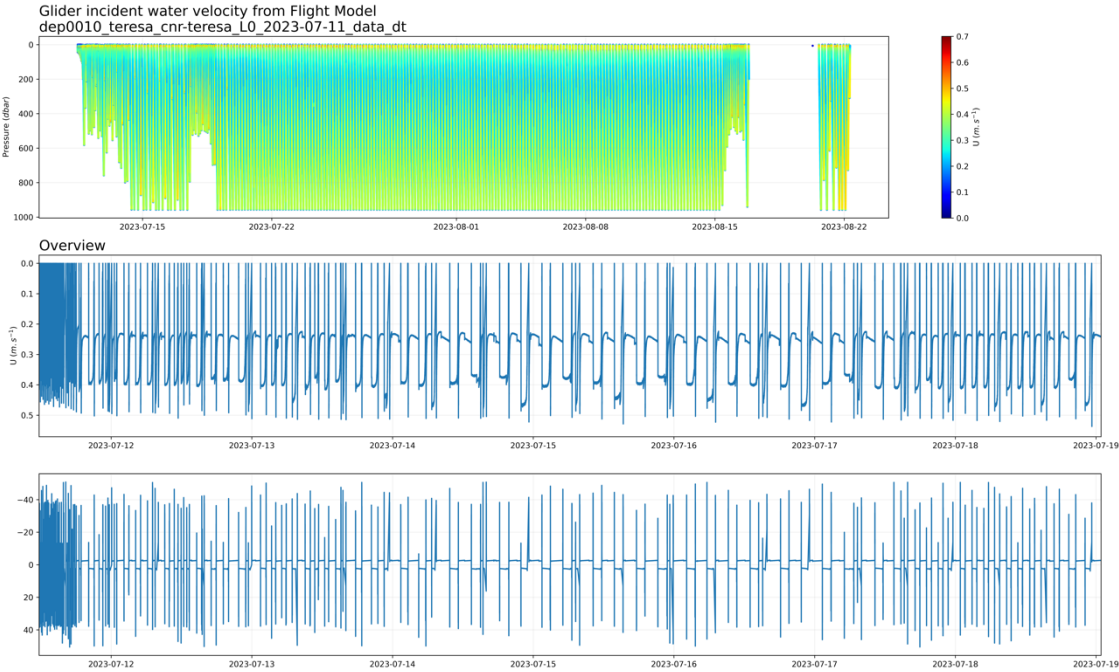

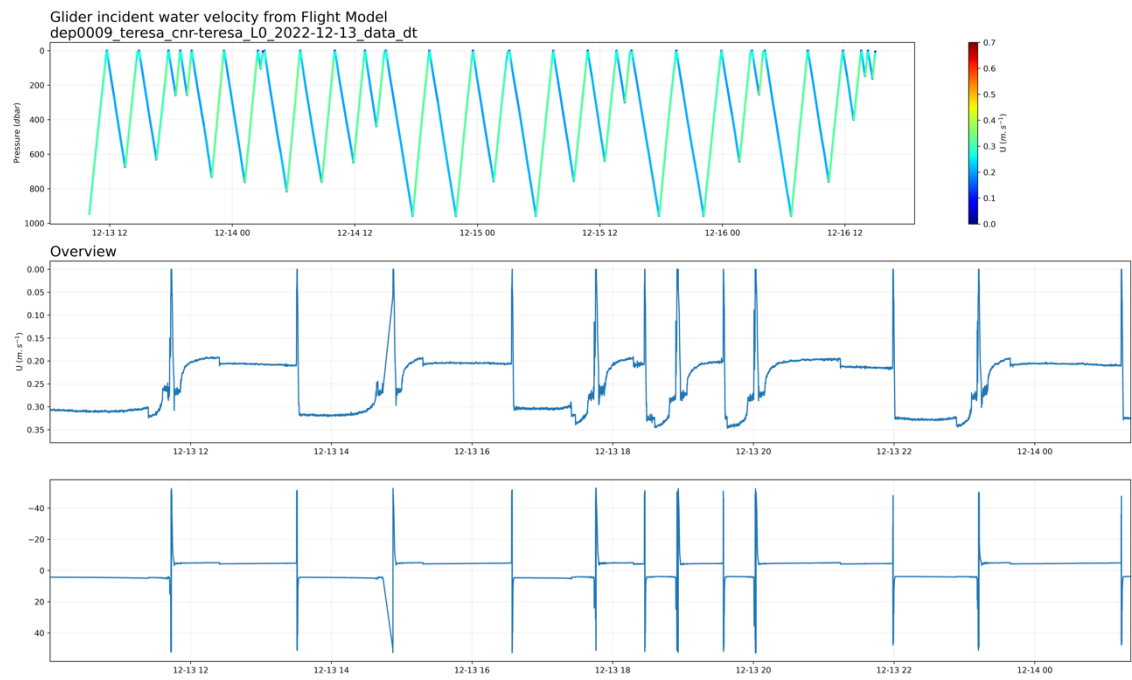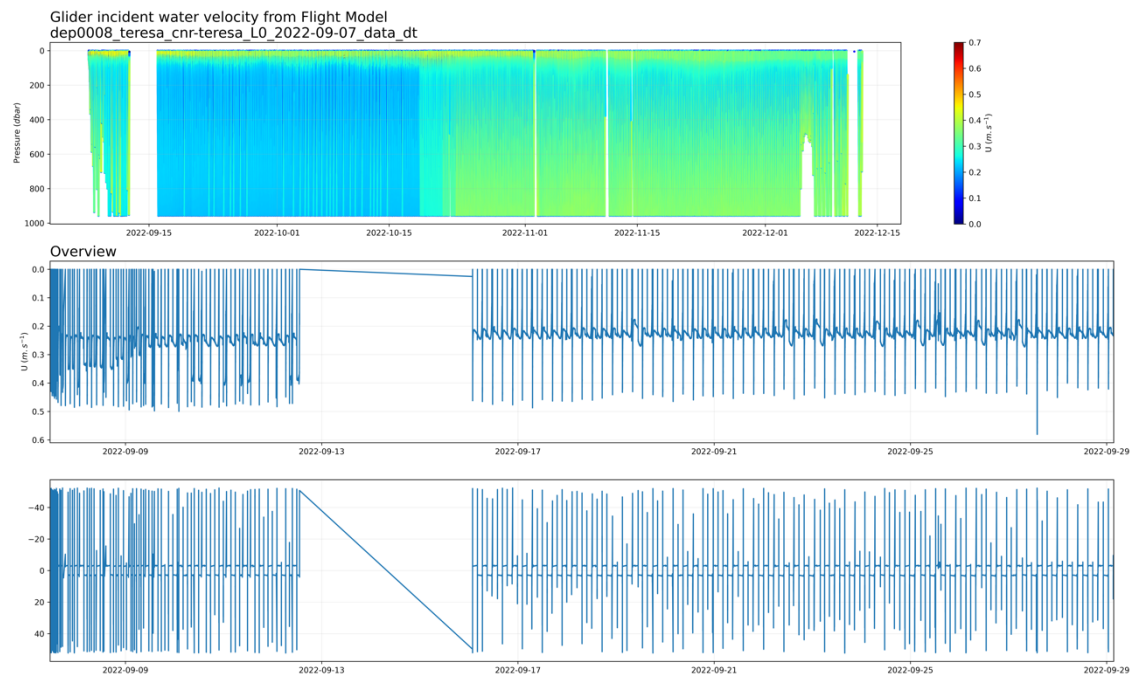

2020

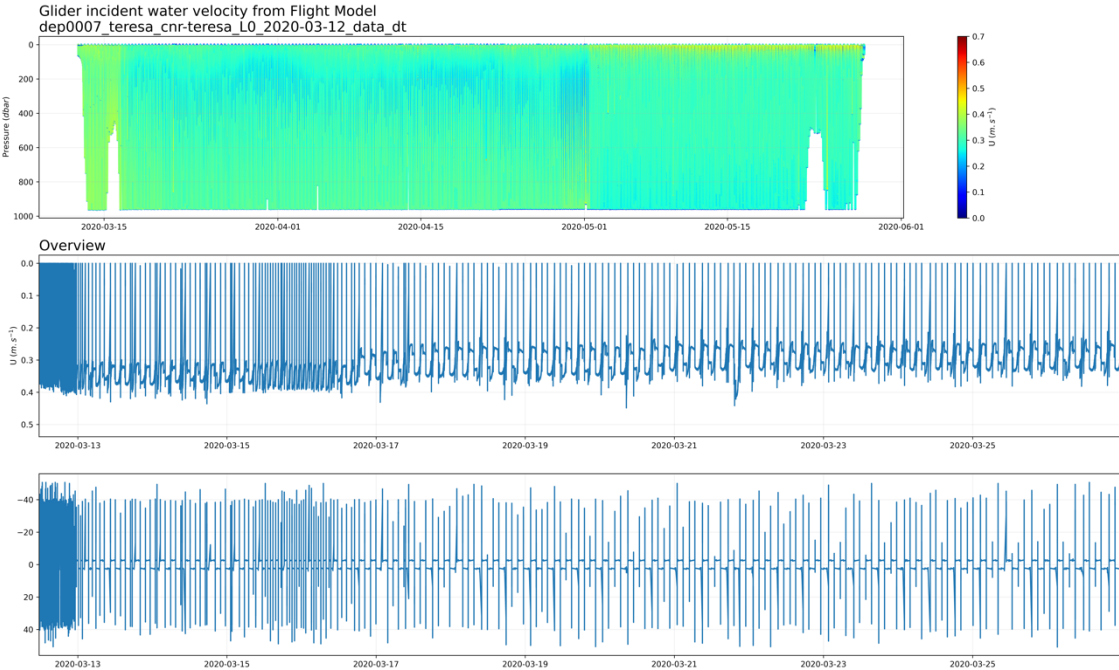

50

2020

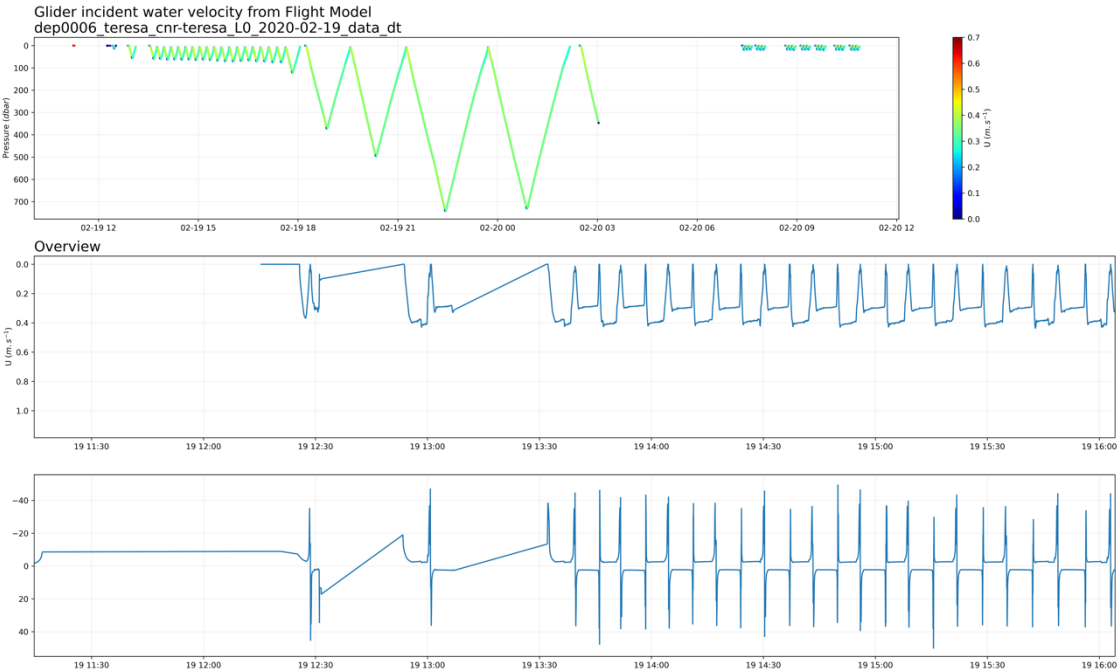

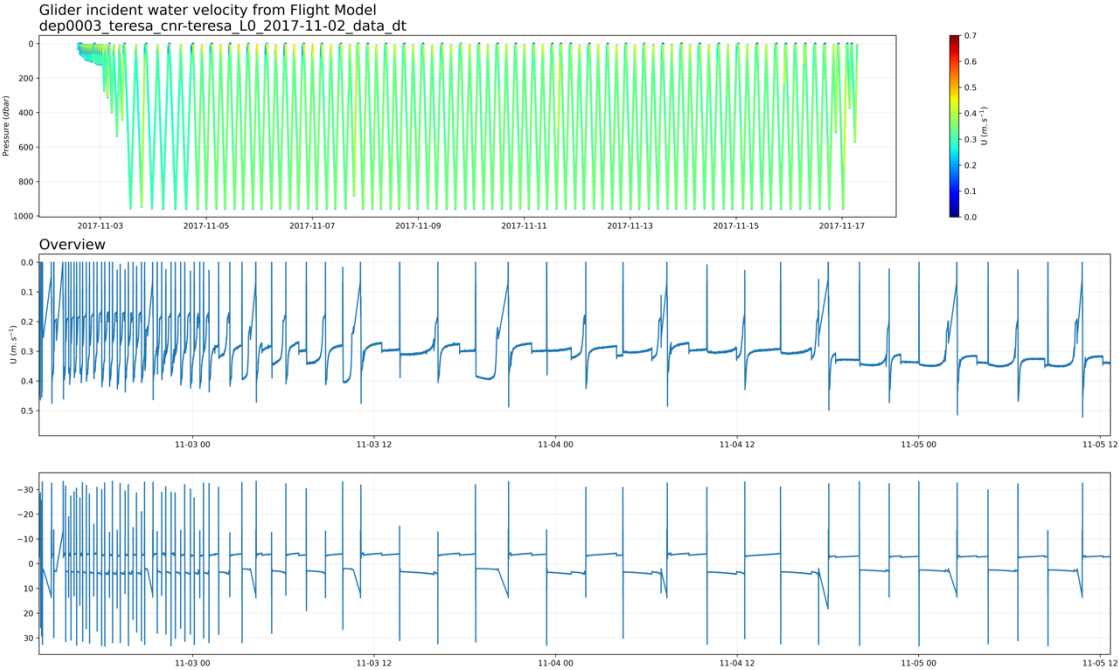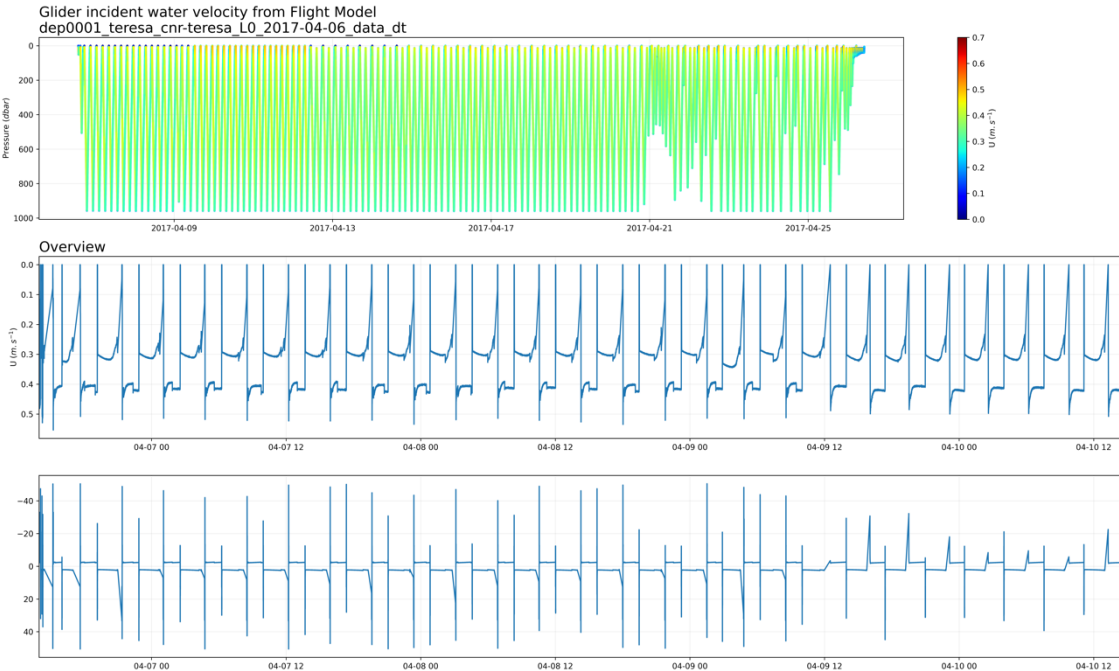

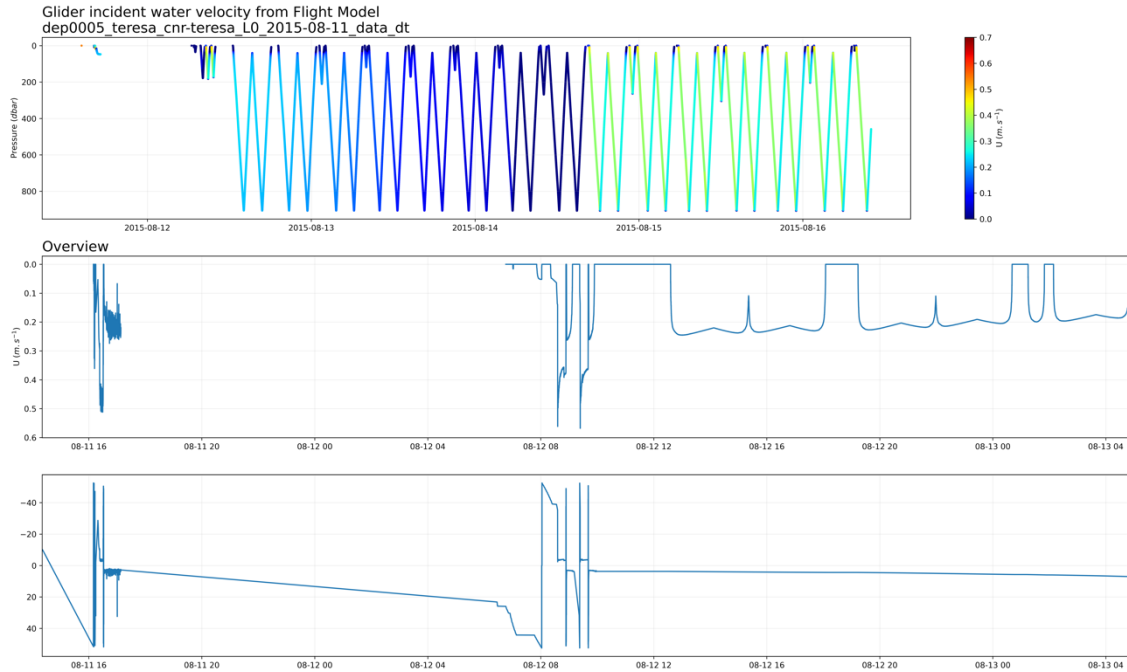

65

70

### Supplementary Figure 2:

75 Gliding sections of turbulent dissipation rate of kinetic energy ( $\epsilon$ , left) and thermal variance dissipation rate ( $\chi$ , right), derived from microstructure profiles along selected mission tracks.

**Top row:** Estimates obtained from cross-checked probe pairs (shear 1 & 2 for  $\epsilon$ ; FP07 1 & 2 for  $\chi$ ), using the strictest quality control criterion (QC = 0).

**Middle and bottom rows:** Estimates based on individual probes. For  $\epsilon$  (left), shear 1 (middle) and shear 2 (bottom) use QC = 0 or 32. For  $\chi$  (right), FP07 1 (middle) and FP07 2 (bottom) use QC = 0 only.

80

2024

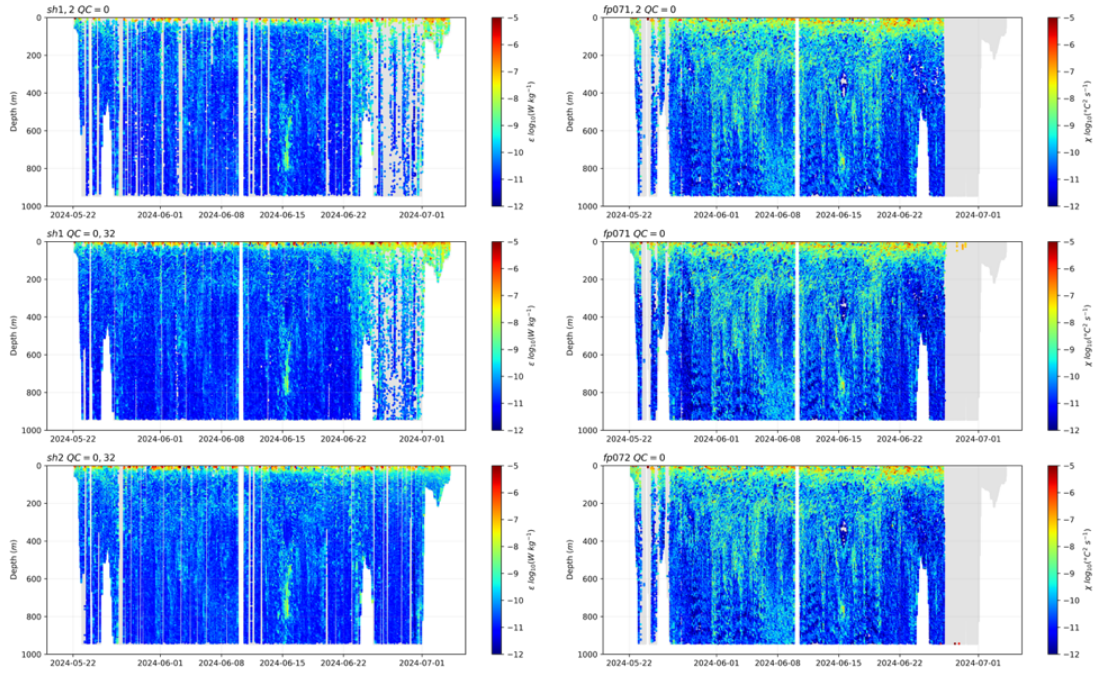

85

2023

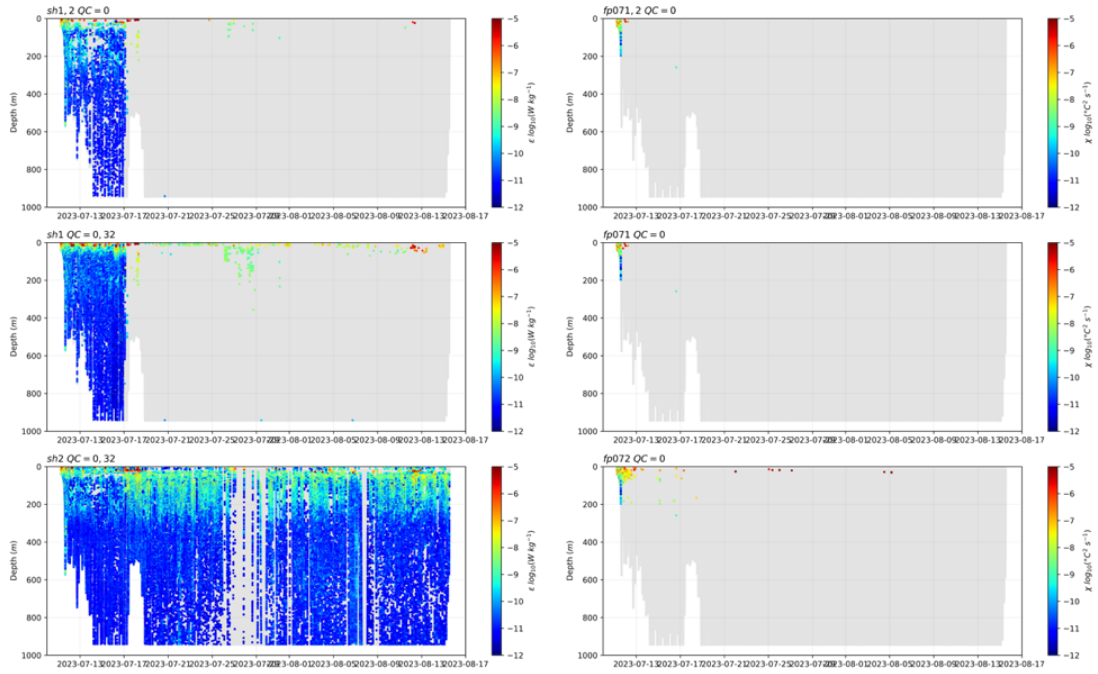

90



2022

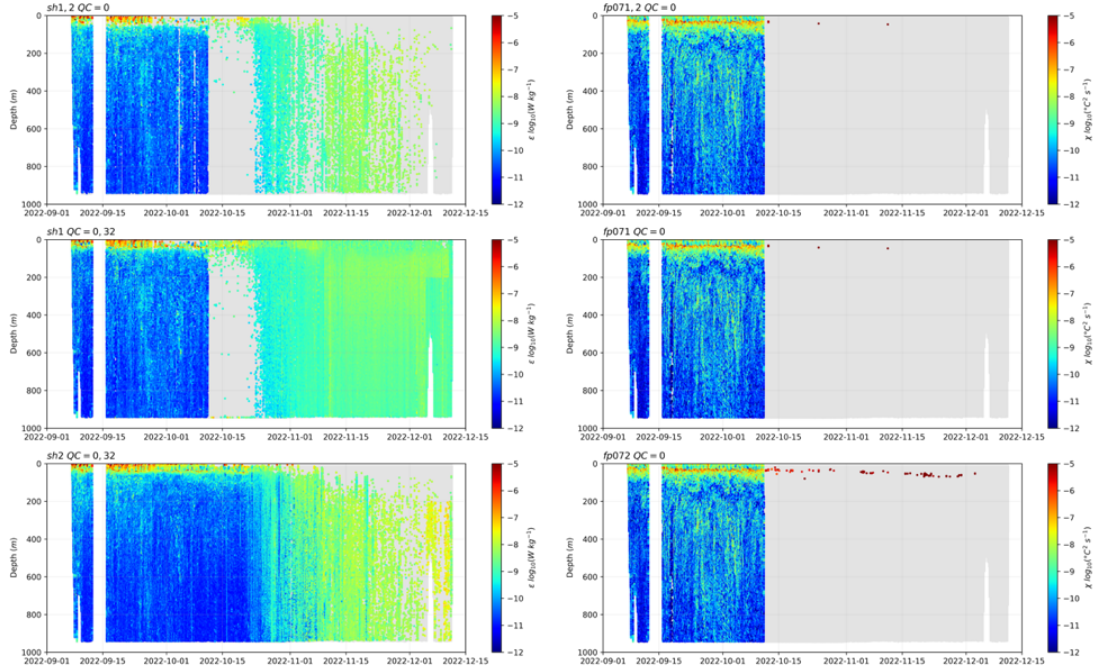

95

2020

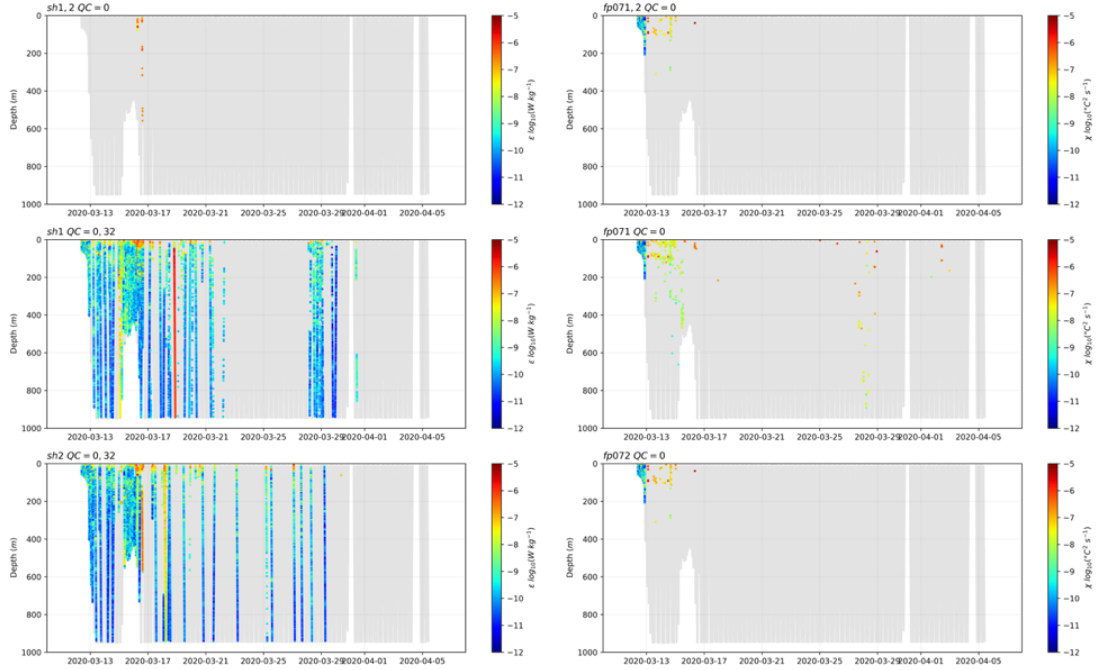

8



2017

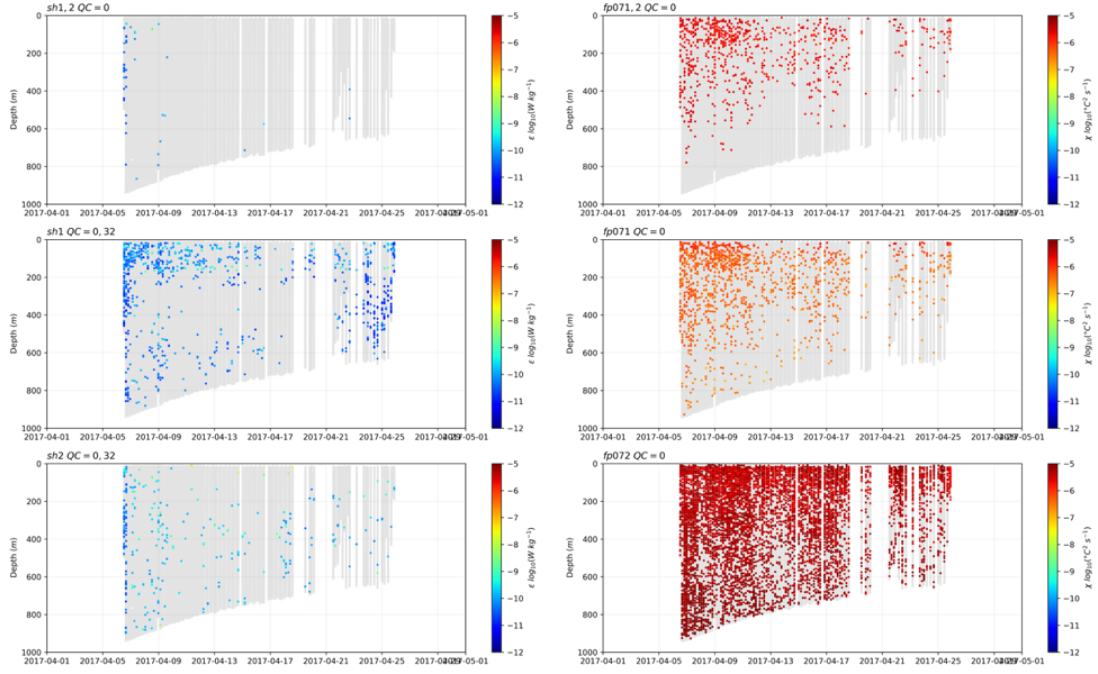

100

2015

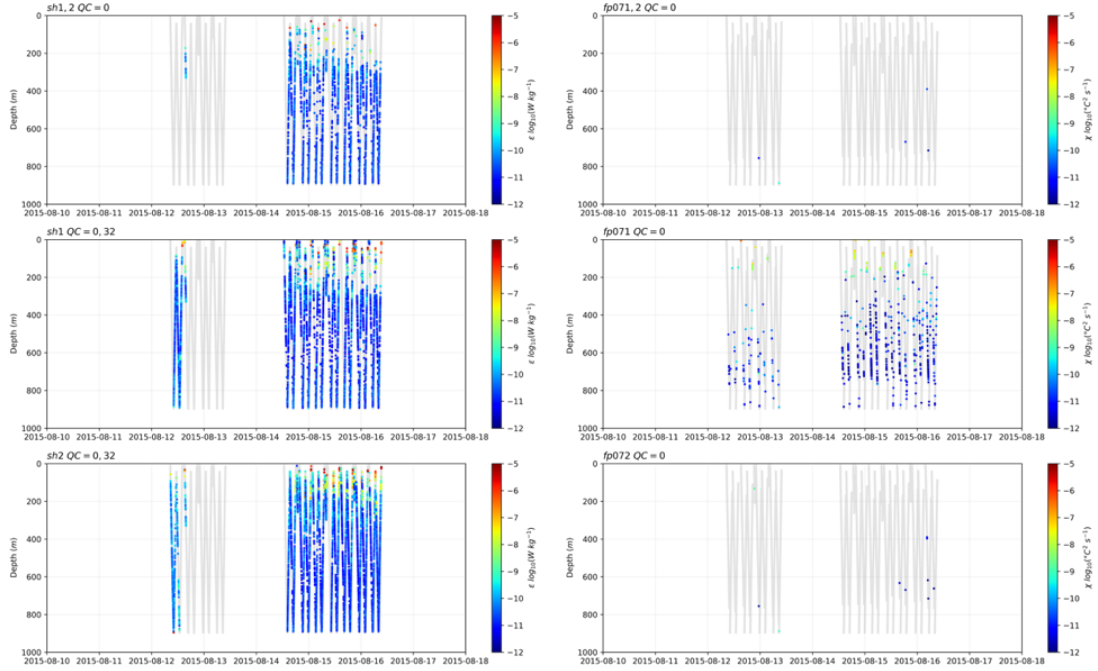

9
